# Supplementary material for: Development and immunological assessment of VLP-based immunogens exposing the membrane-proximal region of the HIV-1 gp41 protein
Source: PubMed Central journal article supplement (PMC4256929; doi:10.1186/s12929-014-0079-x), 2014-08-27
Supplement: 12929_2014_79_MOESM1_ESM.pdf [file 12929_2014_79_MOESM1_ESM.pdf]

## Supplementary table 1. Overview on synthetic oligonucleotides used for cloning.

| ID  | Sequence                                                                                                                 | Name                                   |
|-----|--------------------------------------------------------------------------------------------------------------------------|----------------------------------------|
| 3E8 | CTGGCTAGCGCCGCCACCATGGATGCCATGAAGCGGGG                                                                                   | NheI-Kozak-TPA fw                      |
| 2H4 | GGTACCTTACTAGGCGTAGTCGGGCACGTCGTAGGGGTAGCTGG<br>CGGGCAGCAGGGTCTGGAAGC                                                    | KpnI-gp41CTM(89.6)-HA rev              |
| 2H5 | GGTACCTTATTAGGCGTAGTCGGGCACGTCGTAGGGGTATGGGTT<br>CGGGATAAGGGTCTGAAACGTGAGTATCC                                           | KpnI-gp41CTM(96ZM)-HA rev              |
| 2H6 | GGTACCCTATCAGGCGTAGTCGGGCACGTCGTAGGGGTAGTCCT<br>GTTGGATATGGGTCTGCTGAAATAAGAGG                                            | KpnI-gp41CTM(SIVmac239)-HA rev         |
| 3B6 | TCGTTCTCGATGTGGTAGATCTTGCTCAGGATCTCCTCGATCTTGT<br>CCTCGATCTGCCTGGCGCCCCTTCTGAACCGGGCGT                                   | TPA-GCN4-Fusion rev                    |
| 3B7 | CCTGAGCAAGATCTACCACATCGAGAACGAGATCGCCCGCATCAA<br>GAAGCTGATCATGGAATGGGAGCGGGAGATCGACAAC                                   | GCN4-gp41CTM(89.6)-Fusion fw           |
| 3B8 | CCTGAGCAAGATCTACCACATCGAGAACGAGATCGCCCGCATCAA<br>GAAGCTGATCATGCAGTGGGACCGGGAGATCAGCAAC                                   | GCN4-gp41CTM(96ZM)- Fusion fw          |
| 3B9 | CCTGAGCAAGATCTACCACATCGAGAACGAGATCGCCCGCATCAA<br>GAAGCTGATCCAGGAATGGGAGCGGAAGGTCTGACTTCC                                 | GCN4-gp41CTM (SIVmac239)-<br>Fusion fw |
| 3H4 | CTCGCTGAACTCCTTCTCGATCTGGTGGAACTTCTCGTTGGTCTTC<br>TCGATCACGCGGTTTCTGCTTCCGTTGATCTGGTTCGATCCGGGCT<br>CCCCGTCTGAACCGGGCGT  | TPA-H3-Fusion rev                      |
| 3H5 | TTCCACCAGATCGAGAAGGAGTTCAGCGAGGTGGAGGGCCGCAT<br>CCAGGACCTGGAGAAGTACGTGGAGGACACCGGCAGCACCATGG<br>AATGGGAGCGGGAGATCGACAAC  | H3-gp41CTM(89.6)-Fusion fw             |
| 3H6 | TTCCACCAGATCGAGAAGGAGTTCAGCGAGGTGGAGGGCCGCAT<br>CCAGGACCTGGAGAAGTACGTGGAGGACACCGGCAGCACCATGC<br>AGTGGGACCGGGAGATCGACAAC  | H3-gp41CTM(96ZM)-Fusion fw             |
| 3H7 | TTCCACCAGATCGAGAAGGAGTTCAGCGAGGTGGAGGGCCGCAT<br>CCAGGACCTGGAGAAGTACGTGGAGGACACCGGCAGCACCCAGG<br>AATGGGAGCGGAAGGTCTGACTTC | H3-gp41CTM(SIVmac239)-Fusion fw        |
